# Supplementary material
Source: PubMed Central journal article supplement (PMC3160649)
Supplement: NIHMS317417-supplement-Supplementary_Data.pdf [file NIHMS317417-supplement-Supplementary_Data.pdf]

## Supplementary Materials for

### Recurrent *GNAS* Mutations Define an Unexpected Pathway for Pancreatic Cyst Development

Jian Wu, Hanno Matthaei, Anirban Maitra, Marco Dal Molin, Laura D. Wood, James R. Eshleman, Michael Goggins, Marcia I. Canto, Richard D. Schulick, Barish H. Edil, Christopher L. Wolfgang, Alison P. Klein, Luis A. Diaz Jr., Peter J. Allen, C. Max Schmidt, Kenneth W. Kinzler, Nickolas Papadopoulos, Ralph H. Hruban, Bert Vogelstein\*

\*To whom correspondence should be addressed. E-mail: bertvog@gmail.com

Published 20 July 2011, *Sci. Transl. Med.* **3**, 92ra66 (2011)

DOI: 10.1126/scitranslmed.3002543

#### The PDF file includes:

- Table S1. Genes analyzed by massively parallel sequencing in IPMN cyst fluids.
- Table S2. Characteristics of patients with IPMNs analyzed in this study, including *GNAS* and *KRAS* mutation status.
- Table S3. Characteristics of patients with cyst types other than IPMN, including *GNAS* and *KRAS* mutation status.
- Table S4. Quantification of mutations in selected IPMNs containing both *GNAS* and *KRAS* mutations.
- Table S5. Comparison of mutational status in DNA from IPMNs and pancreatic adenocarcinomas from the same patients.
- Table S6. Oligonucleotide primer and probe sequences.

Table S1. Genes analyzed by massively parallel sequencing in IPMN cyst fluids.

| <b>Gene symbol</b> | <b>Accession Number</b> | <b>Oncogene or Tumor Suppressor Gene</b> |
|--------------------|-------------------------|------------------------------------------|
| ABL1               | X16416                  | Oncogene                                 |
| ARHGAP29           | NM_004815.2             | Suppressor Gene                          |
| AKT1               | NM_005163               | Oncogene                                 |
| ALK                | NM_004304               | Oncogene                                 |
| JARID1C            | NM_004187.1             | Suppressor Gene                          |
| APC                | NM_000038               | Suppressor Gene                          |
| ATM                | NM_000051               | Suppressor Gene                          |
| UBR4               | NM_020765.1             | Suppressor Gene                          |
| BRAF               | NM_004333               | Oncogene                                 |
| BRCA1              | NM_007294.1             | Suppressor Gene                          |
| BRCA2              | NM_000059.1             | Suppressor Gene                          |
| CBL                | NM_005188.1             | Oncogene                                 |
| CDC73              | NM_024529.3             | Suppressor Gene                          |
| CDH1               | NM_004360.2             | Suppressor Gene                          |
| CDKN2A             | NM_000077               | Suppressor Gene                          |
| CEBPA              | NM_004364.2             | Suppressor Gene                          |
| CSF1R              | NM_005211               | Oncogene                                 |
| CTNNA1             | NM_001903.2             | Suppressor Gene                          |
| CTNNB1             | NM_001904               | Oncogene                                 |
| ATR                | NM_001184               | Suppressor Gene                          |
| CYLD               | NM_015247.1             | Suppressor Gene                          |
| LRRK2              | SU_LRRK2                | Suppressor Gene                          |
| KIAA1409           | ENST00000256339         | Suppressor Gene                          |
| SPTAN1             | ENST00000372731         | Suppressor Gene                          |
| ATRX               | NM_138271.1             | Suppressor Gene                          |
| SPEG               | SU_SPEG                 | Suppressor Gene                          |
| MAST4              | SU_MAST4                | Suppressor Gene                          |
| DPYSL4             | ENST00000338492         | Oncogene                                 |
| EGFL6              | NM_015507.2             | Oncogene                                 |
| EGFR               | NM_005228               | Oncogene                                 |
| WNK2               | SU_WNK2                 | Suppressor Gene                          |
| CAD                | NM_004341.2             | Suppressor Gene                          |
| SORL1              | ENST00000260197         | Suppressor Gene                          |
| NUP214             | NM_005085.2             | Suppressor Gene                          |
| ERBB2              | NM_004448               | Oncogene                                 |
| TECTA              | ENST00000392793         | Suppressor Gene                          |
| ADAMTS20           | NM_025003.2             | Suppressor Gene                          |
| TRIP11             | ENST00000267622         | Suppressor Gene                          |
| FAM123B            | NM_152424.1             | Suppressor Gene                          |
| FBXW7              | NM_033632.1             | Suppressor Gene                          |
| TAF1               | NM_138923               | Suppressor Gene                          |
| FGFR3              | NM_000142               | Oncogene                                 |
| FLT3               | Z26652                  | Oncogene                                 |

|          |                 |                 |
|----------|-----------------|-----------------|
| COL14A1  | NM_021110.1     | Suppressor Gene |
| FOXL2    | NM_023067.2     | Oncogene        |
| NUP98    | NM_016320.2     | Suppressor Gene |
| GATA1    | NM_002049.2     | Suppressor Gene |
| CDC42BPB | NM_006035       | Suppressor Gene |
| LTBP1    | NM_206943.1     | Suppressor Gene |
| TAF1L    | NM_153809       | Suppressor Gene |
| GNAQ     | NM_002072.2     | Oncogene        |
| GNAS     | NM_000516.3     | Oncogene        |
| ITSN2    | NM_006277.1     | Suppressor Gene |
| N4BP2    | NM_018177.2     | Suppressor Gene |
| JARID1A  | NM_005056.1     | Suppressor Gene |
| DEPDC2   | NM_024870.2     | Suppressor Gene |
| HNF1A    | NM_000545.3     | Suppressor Gene |
| HRAS     | NM_005343       | Oncogene        |
| IDH1     | NM_005896.2     | Oncogene        |
| IDH2     | NM_002168.2     | Oncogene        |
| GLI3     | NM_000168.2     | Suppressor Gene |
| CENTD3   | NM_022481.4     | Suppressor Gene |
| BAZ1A    | NM_013448.2     | Suppressor Gene |
| MAP4K4   | NM_145686       | Suppressor Gene |
| COL1A1   | ENST00000225964 | Suppressor Gene |
| ASXL1    | ENST00000358956 | Suppressor Gene |
| JAK2     | NM_004972       | Oncogene        |
| JAK3     | NM_000215       | Oncogene        |
| ROCK2    | NM_004850       | Suppressor Gene |
| ROCK1    | NM_005406       | Suppressor Gene |
| IKBKAP   | NM_003640.2     | Suppressor Gene |
| KIT      | NM_000222       | Oncogene        |
| IGF1R    | NM_000875       | Suppressor Gene |
| KRAS     | NM_004985       | Oncogene        |
| STK36    | NM_015690       | Suppressor Gene |
| RAD50    | NM_133482.1     | Suppressor Gene |
| MAP3K6   | NM_004672       | Suppressor Gene |
| PER1     | ENST00000317276 | Suppressor Gene |
| WNK4     | NM_032387       | Suppressor Gene |
| MAP2K4   | NM_003010       | Suppressor Gene |
| ADAMTS18 | NM_199355.1     | Suppressor Gene |
| MGA      | XM_031689.7     | Suppressor Gene |
| ABL2     | NM_005158       | Suppressor Gene |
| TSC1     | NM_000368.2     | Suppressor Gene |
| MEN1     | ENST00000312049 | Suppressor Gene |
| MET      | NM_000245       | Oncogene        |
| TNKS2    | AF264912.1      | Suppressor Gene |
| TNK2     | NM_005781       | Suppressor Gene |
| TRIM33   | NM_015906       | Suppressor Gene |

|         |                 |                 |
|---------|-----------------|-----------------|
| MLH1    | NM_000249.2     | Suppressor Gene |
| ULK2    | NM_014683       | Suppressor Gene |
| GUCY2F  | NM_001522       | Suppressor Gene |
| HDAC4   | NM_006037.2     | Suppressor Gene |
| MPL     | NM_005373.1     | Oncogene        |
| MSH2    | NM_000251.1     | Suppressor Gene |
| MSH6    | NM_000179.1     | Suppressor Gene |
| ERN2    | NM_033266.1     | Suppressor Gene |
| USP24   | XM_371254.3     | Suppressor Gene |
| NF1     | ENST00000358273 | Suppressor Gene |
| NF2     | NM_000268.2     | Suppressor Gene |
| NFKB1   | NM_003998.2     | Suppressor Gene |
| EPHB1   | NM_004441       | Suppressor Gene |
| NOTCH1  | NM_017617.2     | Suppressor Gene |
| NOTCH2  | NM_024408.2     | Suppressor Gene |
| NPM1    | NM_002520.4     | Suppressor Gene |
| NRAS    | NM_002524       | Oncogene        |
| PHF14   | NM_001007157.1  | Suppressor Gene |
| ROR2    | NM_004560       | Suppressor Gene |
| TNPO1   | NM_002270.2     | Suppressor Gene |
| PDGFRA  | NM_006206       | Oncogene        |
| AXL     | NM_001699       | Suppressor Gene |
| PRKD2   | NM_016457       | Suppressor Gene |
| TTK     | NM_003318       | Suppressor Gene |
| PIK3CA  | NM_006218.1     | Oncogene        |
| TNNI3K  | NM_015978       | Suppressor Gene |
| PRKAR1A | NM_212472.1     | Suppressor Gene |
| VEPH1   | ENST00000392832 | Suppressor Gene |
| HIF1A   | NM_001530.2     | Suppressor Gene |
| PTCH1   | NM_000264.2     | Suppressor Gene |
| PTEN    | NM_000314.4     | Suppressor Gene |
| PTPN11  | NM_002834.3     | Oncogene        |
| PTPRC   | NM_002838.2     | Oncogene        |
| RPS6KA2 | NM_021135       | Suppressor Gene |
| BRD2    | NM_005104       | Suppressor Gene |
| ITGB3   | NM_000212.2     | Suppressor Gene |
| RB1     | NM_000321       | Suppressor Gene |
| RET     | NM_020975       | Oncogene        |
| ADAM29  | NM_014269.2     | Suppressor Gene |
| ANAPC5  | NM_016237.3     | Suppressor Gene |
| ITGB2   | NM_000211.1     | Suppressor Gene |
| CHUK    | NM_001278       | Suppressor Gene |
| TCF12   | NM_207037.1     | Suppressor Gene |
| PDZRN4  | NM_013377.2     | Suppressor Gene |
| RUNX1   | ENST00000300305 | Suppressor Gene |
| SETD2   | ENST00000330022 | Suppressor Gene |

|          |                 |                 |
|----------|-----------------|-----------------|
| SMAD2    | NM_005901.3     | Suppressor Gene |
| SMAD4    | NM_005359.3     | Suppressor Gene |
| SMARCA4  | NM_003072.2     | Suppressor Gene |
| SMARCB1  | NM_003073.2     | Suppressor Gene |
| PAK7     | NM_020341       | Suppressor Gene |
| SMO      | NM_005631.3     | Oncogene        |
| APBB1IP  | NM_019043.3     | Suppressor Gene |
| SOCS1    | NM_003745.1     | Suppressor Gene |
| PRKCA    | NM_002737       | Suppressor Gene |
| NEK11    | NM_024800.2     | Suppressor Gene |
| TCF7L2   | ENST00000369397 | Suppressor Gene |
| STK11    | NM_000455       | Suppressor Gene |
| ITK      | NM_005546       | Suppressor Gene |
| MAP3K2   | NM_006609       | Suppressor Gene |
| ACVR1B   | NM_020328       | Suppressor Gene |
| CDC7     | NM_003503.2     | Suppressor Gene |
| TGFBR2   | NM_003242       | Suppressor Gene |
| SRC      | NM_005417       | Suppressor Gene |
| TNFAIP3  | NM_006290.2     | Suppressor Gene |
| BMPR1A   | NM_004329       | Suppressor Gene |
| ACVR2A   | NM_001616       | Suppressor Gene |
| RAD18    | NM_020165.2     | Suppressor Gene |
| SUFU     | NM_016169.2     | Suppressor Gene |
| TP53     | NM_000546       | Suppressor Gene |
| MAP2K7   | NM_005043       | Suppressor Gene |
| STK32B   | NM_018401       | Suppressor Gene |
| TSHR     | NM_000369.1     | Oncogene        |
| MGC42105 | NM_153361       | Suppressor Gene |
| STK19    | NM_032454       | Suppressor Gene |
| UTX      | NM_021140.1     | Suppressor Gene |
| VHL      | NM_000551.2     | Suppressor Gene |
| LDHB     | NM_002300.3     | Suppressor Gene |
| WT1      | NM_024426.2     | Suppressor Gene |
| PHOX2B   | ENST00000381741 | Suppressor Gene |

Table S2. Characteristics of patients with IPMNs analyzed in this study, including *GNAS* and *KRAS* mutation status.

| IPMN # | KRAS mutation        | GNAS mutation        | Age at surgery | Sex | History of smoking | Post-operative diagnosis | Cyst Grade   | Cyst diameter (cm) | Duct type      | IPMN :Subtype    | Cyst location   | Sample type |
|--------|----------------------|----------------------|----------------|-----|--------------------|--------------------------|--------------|--------------------|----------------|------------------|-----------------|-------------|
| 1      | G12V                 | R201C                | 71             | M   | No                 | IPMN                     | intermediate | 3.0                | mixed          | gastric          | body/tail       | Cyst wall   |
| 2      | G12D                 | R201H                | 68             | M   | unknown            | IPMN                     | high         | 2.0                | branch         | gastric          | body/tail       | Cyst wall   |
| 3      | G12D                 | R201H                | 69             | M   | unknown            | IPMN                     | intermediate | 2.0                | branch         | gastric          | head            | Cyst wall   |
| 4      | G12R                 | R201H                | 73             | F   | unknown            | IPMN                     | high         | 3.2                | main           | pancreatobiliary | head            | Cyst wall   |
| 5      | G12D & G12R          | No mutation detected | 66             | F   | No                 | IPMN                     | intermediate | 4.0                | branch         | gastric          | entire pancreas | Cyst fluid  |
| 6      | G12R                 | R201C                | 63             | M   | unknown            | IPMN                     | high         | 8.0                | mixed          | intestinal       | head            | Cyst wall   |
| 7      | No mutation detected | R201H                | 64             | F   | No                 | IPMN                     | high         | 2.0                | branch         | intestinal       | body/tail       | Cyst wall   |
| 8      | G12V                 | No mutation detected | 80             | M   | No                 | IPMN                     | high         | 2.0                | main           | gastric          | body/tail       | Cyst wall   |
| 9      | G12V & G12D          | R201C & R201H        | 74             | M   | No                 | IPMN                     | high         | 6.5                | main           | pancreatobiliary | entire pancreas | Cyst wall   |
| 10     | G12D                 | R201C                | 39             | F   | No                 | IPMN                     | low          | 2.0                | branch         | gastric          | head            | Cyst wall   |
| 11     | G12D                 | R201C                | 67             | F   | No                 | IPMN                     | low          | 2.0                | main           | gastric          | head            | Cyst wall   |
| 12     | G12V                 | No mutation detected | 70             | M   | No                 | IPMN                     | high         | 2.0                | main           | gastric          | head            | Cyst wall   |
| 13     | G12V                 | R201H                | 78             | M   | No                 | IPMN                     | high         | 3.0                | branch         | gastric          | head            | Cyst wall   |
| 14     | G12V                 | R201H                | 79             | M   | No                 | IPMN                     | high         | 5.0                | branch         | gastric          | head            | Cyst wall   |
| 15     | G12D                 | R201C                | 84             | M   | No                 | IPMN                     | low          | 1.5                | branch         | gastric          | head            | Cyst wall   |
| 16     | G12D                 | R201C                | 66             | F   | No                 | IPMN                     | intermediate | 1.8                | branch         | gastric          | head            | Cyst wall   |
| 17     | G12D                 | R201C                | 63             | F   | Yes                | IPMN                     | high         | 1.8                | branch         | gastric          | body/tail       | Cyst wall   |
| 18     | G12D                 | R201C                | 81             | F   | Yes                | IPMN                     | intermediate | 3.0                | not determined | gastric          | head            | Cyst wall   |
| 19     | G12D                 | R201H                | 69             | M   | Yes                | IPMN                     | low          | 2.5                | not determined | gastric          | head            | Cyst wall   |
| 20     | G12V                 | R201C                | 70             | M   | unknown            | IPMN                     | high         | 5.0                | mixed          | not determined   | body/tail       | Cyst wall   |
| 21     | No mutation detected | R201H                | 80             | M   | unknown            | IPMN                     | high         | 0.7                | main           | gastric          | body/tail       | Cyst wall   |
| 22     | No mutation detected | R201C                | 50             | F   | unknown            | IPMN                     | low          | 1.2                | mixed          | intestinal       | body/tail       | Cyst wall   |
| 23     | No mutation detected | R201C                | 81             | M   | unknown            | IPMN                     | high         | 2.5                | main           | intestinal       | body/tail       | Cyst wall   |
| 24     | G12V                 | R201C                | 51             | F   | unknown            | IPMN                     | intermediate | 1.0                | mixed          | gastric          | head            | Cyst wall   |
| 25     | No mutation detected | R201H                | 78             | M   | unknown            | IPMN                     | high         | 3.0                | mixed          | intestinal       | head            | Cyst wall   |
| 26     | G12D                 | R201H                | 70             | F   | unknown            | IPMN                     | intermediate | 1.4                | branch         | not determined   | head            | Cyst wall   |
| 27     | G12D                 | R201C                | 66             | F   | unknown            | IPMN                     | low          | 2.7                | mixed          | gastric          | head            | Cyst wall   |
| 28     | G12D                 | No mutation detected | 62             | M   | unknown            | IPMN                     | intermediate | 3.5                | branch         | gastric          | head            | Cyst wall   |
| 29     | G12D & G12V          | No mutation detected | 88             | M   | Yes                | IPMN                     | high         | 3.5                | main           | pancreatobiliary | body/tail       | Cyst fluid  |
| 30     | No mutation detected | R201C                | 65             | M   | Yes                | IPMN                     | high         | 6.5                | main           | gastric          | head            | Cyst fluid  |
| 31     | G12D & G12V & G12R   | R201H                | 79             | M   | unknown            | IPMN                     | high         | 2.5                | branch         | not determined   | head            | Cyst fluid  |
| 32     | G12R                 | No mutation detected | 74             | F   | unknown            | IPMN                     | high         | 5.0                | mixed          | pancreatobiliary | head            | Cyst wall   |
| 33     | G12V                 | R201H                | 82             | F   | unknown            | IPMN                     | high         | 0.5                | main           | not determined   | head            | Cyst wall   |
| 34     | G12V                 | R201C                | 75             | M   | No                 | IPMN                     | high         | 2.8                | main           | gastric          | body/tail       | Cyst fluid  |
| 35     | G12V & G12D          | R201H                | 58             | F   | No                 | IPMN                     | low          | 1.5                | branch         | gastric          | head            | Cyst fluid  |
| 36     | G12D                 | R201H                | 69             | M   | Yes                | IPMN                     | intermediate | 2.8                | branch         | gastric          | head            | Cyst fluid  |
| 37     | G12V                 | No mutation detected | 73             | M   | unknown            | IPMN                     | intermediate | 2.0                | branch         | gastric          | body/tail       | Cyst fluid  |
| 38     | No mutation detected | No mutation detected | 48             | M   | No                 | IPMN                     | high         | 2.5                | main           | not determined   | head            | Cyst wall   |
| 39     | G12D                 | No mutation detected | 69             | F   | Yes                | IPMN                     | low          | 1.1                | mixed          | not determined   | head            | Cyst fluid  |
| 40     | G12R                 | R201C                | 76             | F   | Yes                | IPMN                     | low          | 4.0                | branch         | not determined   | tail            | Cyst fluid  |
| 41     | G12D                 | R201C                | 72             | M   | Yes                | IPMN                     | intermediate | 1.9                | branch         | not determined   | head            | Cyst fluid  |
| 42     | G12D                 | R201C                | 68             | M   | Yes                | IPMN                     | high         | 2.0                | mixed          | not determined   | head            | Cyst fluid  |
| 43     | G12D                 | R201H                | 76             | F   | Yes                | IPMN                     | high         | 0.8                | mixed          | not determined   | body            | Cyst fluid  |
| 44     | G12D                 | No mutation detected | 70             | F   | No                 | IPMN                     | low          | 5.6                | branch         | not determined   | head            | Cyst fluid  |
| 45     | No mutation detected | R201H                | 85             | F   | No                 | IPMN                     | intermediate | 4.5                | mixed          | not determined   | neck            | Cyst fluid  |
| 46     | No mutation detected | R201H                | 72             | F   | No                 | IPMN                     | low          | 2.0                | branch         | not determined   | tail            | Cyst fluid  |
| 47     | G12D                 | No mutation detected | 62             | M   | No                 | IPMN                     | low          | 2.9                | branch         | not determined   | tail            | Cyst fluid  |
| 48     | G12R                 | R201C & R201H        | 84             | F   | No                 | IPMN                     | low          | 3.2                | branch         | not determined   | tail            | Cyst fluid  |
| 49     | G12D                 | No mutation detected | 71             | M   | unknown            | IPMN                     | high         | 1.5                | main           | not determined   | body            | Cyst fluid  |
| 50     | G12D                 | R201C                | 70             | M   | unknown            | IPMN                     | intermediate | 3.0                | branch         | not determined   | body            | Cyst fluid  |
| 51     | G12V                 | No mutation detected | 76             | F   | unknown            | IPMN                     | low          | 3.4                | branch         | not determined   | body            | Cyst fluid  |

|     |                      |                      |    |   |         |      |              |      |                |                  |           |            |
|-----|----------------------|----------------------|----|---|---------|------|--------------|------|----------------|------------------|-----------|------------|
| 52  | G12V & G12R          | No mutation detected | 79 | F | unknown | IPMN | intermediate | 4.2  | mixed          | not determined   | body      | Cyst fluid |
| 53  | No mutation detected | No mutation detected | 72 | F | unknown | IPMN | high         | 6.7  | main           | not determined   | body/tail | Cyst fluid |
| 54  | G12D                 | R201C                | 76 | F | unknown | IPMN | high         | 8.5  | not determined | not determined   | body/tail | Cyst fluid |
| 55  | No mutation detected | No mutation detected | 61 | F | unknown | IPMN | intermediate | 1.5  | branch         | not determined   | head      | Cyst fluid |
| 56  | G12V                 | R201H                | 86 | M | unknown | IPMN | intermediate | 1.5  | branch         | not determined   | head      | Cyst fluid |
| 57  | G12R                 | R201C                | 68 | M | unknown | IPMN | intermediate | 2.0  | branch         | not determined   | head      | Cyst fluid |
| 58  | G12D                 | No mutation detected | 66 | M | unknown | IPMN | high         | 2.0  | main           | not determined   | head      | Cyst fluid |
| 59  | G12V                 | R201C                | 81 | M | unknown | IPMN | high         | 2.8  | not determined | not determined   | head      | Cyst fluid |
| 60  | G12D & G12V          | No mutation detected | 68 | M | unknown | IPMN | high         | 2.8  | mixed          | not determined   | head      | Cyst fluid |
| 61  | G12V                 | No mutation detected | 80 | M | unknown | IPMN | high         | 2.8  | main           | not determined   | head      | Cyst fluid |
| 62  | G12V                 | R201H                | 74 | F | unknown | IPMN | intermediate | 3.0  | branch         | not determined   | head      | Cyst fluid |
| 63  | G12V                 | R201C                | 65 | F | unknown | IPMN | high         | 3.0  | mixed          | not determined   | head      | Cyst fluid |
| 64  | G12V                 | No mutation detected | 72 | F | unknown | IPMN | low          | 3.4  | branch         | not determined   | head      | Cyst fluid |
| 65  | G12D & G12R          | R201C                | 65 | F | unknown | IPMN | intermediate | 3.5  | branch         | not determined   | head      | Cyst fluid |
| 66  | G12V                 | No mutation detected | 76 | F | unknown | IPMN | intermediate | 3.9  | branch         | not determined   | head      | Cyst fluid |
| 67  | G12V                 | R201C & R201H        | 77 | F | unknown | IPMN | intermediate | 4.0  | branch         | not determined   | head      | Cyst fluid |
| 68  | No mutation detected | R201C                | 87 | F | unknown | IPMN | intermediate | 4.0  | mixed          | not determined   | head      | Cyst fluid |
| 69  | No mutation detected | R201C                | 70 | M | unknown | IPMN | high         | 4.0  | mixed          | not determined   | head      | Cyst fluid |
| 70  | G12V                 | R201C                | 52 | F | unknown | IPMN | high         | 4.2  | mixed          | not determined   | head      | Cyst fluid |
| 71  | G12V                 | No mutation detected | 73 | F | unknown | IPMN | intermediate | 4.5  | branch         | not determined   | head      | Cyst fluid |
| 72  | G12D                 | R201H                | 74 | F | unknown | IPMN | intermediate | 5.0  | branch         | not determined   | head      | Cyst fluid |
| 73  | G12V                 | R201C                | 63 | M | unknown | IPMN | high         | 6.0  | main           | not determined   | head      | Cyst fluid |
| 74  | No mutation detected | R201C                | 63 | M | unknown | IPMN | high         | 6.5  | mixed          | not determined   | head      | Cyst fluid |
| 75  | No mutation detected | R201C                | 67 | F | unknown | IPMN | high         | 7.0  | main           | not determined   | head      | Cyst fluid |
| 76  | G12D                 | No mutation detected | 79 | M | unknown | IPMN | low          | 13.0 | main           | not determined   | head      | Cyst fluid |
| 77  | G12V                 | No mutation detected | 86 | F | unknown | IPMN | intermediate | 1.7  | branch         | not determined   | tail      | Cyst fluid |
| 78  | G12D & G12V          | R201C & R201H        | 74 | M | unknown | IPMN | intermediate | 2.0  | mixed          | not determined   | tail      | Cyst fluid |
| 79  | G12V & G12R          | R201H                | 70 | M | unknown | IPMN | intermediate | 2.2  | branch         | not determined   | tail      | Cyst fluid |
| 80  | No mutation detected | R201C                | 68 | M | unknown | IPMN | high         | 2.5  | main           | not determined   | tail      | Cyst fluid |
| 81  | G12D                 | No mutation detected | 77 | F | unknown | IPMN | high         | 2.6  | mixed          | not determined   | tail      | Cyst fluid |
| 82  | G12V                 | R201C                | 67 | M | unknown | IPMN | intermediate | 2.7  | branch         | not determined   | tail      | Cyst fluid |
| 83  | G12D & G12V          | No mutation detected | 80 | F | unknown | IPMN | intermediate | 3.5  | mixed          | not determined   | tail      | Cyst fluid |
| 84  | G12D                 | No mutation detected | 68 | F | unknown | IPMN | intermediate | 6.0  | branch         | not determined   | tail      | Cyst fluid |
| 85  | G12D & G12V          | No mutation detected | 68 | F | unknown | IPMN | intermediate | 6.0  | branch         | not determined   | tail      | Cyst fluid |
| 86  | G12D & G12V          | R201C                | 69 | M | unknown | IPMN | high         | 23.0 | main           | not determined   | tail      | Cyst fluid |
| 87  | G12D & G12V & G12R   | R201C & R201H        | 69 | M | unknown | IPMN | high         | 23.0 | main           | not determined   | tail      | Cyst fluid |
| 88  | No mutation detected | R201C                | 72 | M | unknown | IPMN | high         | 1.4  | main           | not determined   | head      | Cyst wall  |
| 89  | G12D                 | R201C                | 74 | M | Yes     | IPMN | intermediate | 3.0  | main           | gastric          | body/tail | Cyst fluid |
| 90  | G12V                 | No mutation detected | 54 | F | No      | IPMN | low          | 2.0  | branch         | gastric          | body/tail | Cyst fluid |
| 91  | No mutation detected | R201H                | 81 | M | No      | IPMN | high         | 1.8  | main           | intestinal       | body/tail | Cyst fluid |
| 92  | G12V                 | R201H                | 63 | F | No      | IPMN | intermediate | 1.9  | branch         | not determined   | body/tail | Cyst fluid |
| 93  | G12D                 | R201C                | 73 | M | No      | IPMN | intermediate | 3.2  | branch         | gastric          | body/tail | Cyst fluid |
| 94  | G12V                 | No mutation detected | 60 | M | No      | IPMN | high         | 4.0  | branch         | pancreatobiliary | head      | Cyst fluid |
| 95  | G12D                 | No mutation detected | 76 | F | No      | IPMN | high         | 1    | branch         | gastric          | head      | Cyst fluid |
| 96  | G12D & G12V          | R201C                | 65 | M | No      | IPMN | intermediate | 1.5  | branch         | gastric          | head      | Cyst fluid |
| 97  | G12V                 | R201H                | 67 | F | No      | IPMN | high         | 4    | branch         | gastric          | head      | Cyst fluid |
| 98  | No mutation detected | R201C                | 54 | M | Yes     | IPMN | intermediate | 4.0  | branch         | gastric          | body/tail | Cyst fluid |
| 99  | G12D                 | No mutation detected | 72 | M | Yes     | IPMN | low          | 0.5  | branch         | gastric          | body/tail | Cyst fluid |
| 100 | G12R                 | R201H                | 73 | M | Yes     | IPMN | intermediate | 3.0  | branch         | gastric          | head      | Cyst fluid |
| 101 | No mutation detected | No mutation detected | 79 | F | Yes     | IPMN | high         | 4.0  | branch         | gastric          | head      | Cyst fluid |
| 102 | G12V                 | No mutation detected | 67 | F | Yes     | IPMN | intermediate | 0.6  | main           | gastric          | head      | Cyst fluid |
| 103 | G12D                 | No mutation detected | 60 | F | Yes     | IPMN | intermediate | 1    | branch         | not determined   | head      | Cyst fluid |
| 104 | G12V                 | R201C                | 54 | F | Yes     | IPMN | intermediate | 1.7  | branch         | gastric          | head      | Cyst fluid |
| 105 | G12V                 | R201H                | 57 | M | Yes     | IPMN | intermediate | 4.5  | branch         | gastric          | head      | Cyst fluid |
| 106 | No mutation detected | No mutation detected | 71 | F | unknown | IPMN | low          | 1.7  | branch         | gastric          | body/tail | Cyst fluid |

|     |                      |                      |    |   |         |      |              |      |                |                  |                 |            |
|-----|----------------------|----------------------|----|---|---------|------|--------------|------|----------------|------------------|-----------------|------------|
| 107 | G12D                 | No mutation detected | 71 | M | unknown | IPMN | low          | 6.0  | branch         | not determined   | head            | Cyst fluid |
| 108 | G12D                 | R201H                | 66 | M | unknown | IPMN | intermediate | 0.6  | branch         | intestinal       | head            | Cyst fluid |
| 109 | No mutation detected | R201H                | 65 | F | unknown | IPMN | intermediate | 1.8  | mixed          | gastric          | head            | Cyst fluid |
| 110 | G12V                 | R201C                | 56 | M | unknown | IPMN | intermediate | 2    | main           | gastric          | head            | Cyst fluid |
| 111 | G12D                 | No mutation detected | 63 | M | unknown | IPMN | intermediate | 3.1  | branch         | gastric          | head            | Cyst fluid |
| 112 | G12R                 | R201C                | 62 | M | unknown | IPMN | intermediate | 3.5  | branch         | not determined   | head            | Cyst fluid |
| 113 | G12D                 | R201C                | 71 | M | unknown | IPMN | low          | 3.5  | branch         | gastric          | head            | Cyst fluid |
| 114 | G12R                 | No mutation detected | 60 | M | No      | IPMN | high         | 13.0 | mixed          | pancreatobiliary | entire pancreas | Cyst wall  |
| 115 | G12D                 | R201H                | 70 | M | No      | IPMN | high         | 4.0  | main           | pancreatobiliary | head            | Cyst wall  |
| 116 | No mutation detected | R201C                | 62 | F | No      | IPMN | high         | 6.0  | main           | gastric          | head            | Cyst wall  |
| 117 | G12D                 | R201C                | 75 | M | unknown | IPMN | high         | 5.0  | not determined | gastric          | head            | Cyst wall  |
| 118 | G12D                 | No mutation detected | 73 | F | Yes     | IPMN | high         | 2.8  | branch         | gastric          | head            | Cyst wall  |
| 119 | G12R                 | No mutation detected | 71 | F | No      | IPMN | low          | 4.0  | branch         | gastric          | body/tail       | Cyst wall  |
| 120 | G12V                 | R201H                | 72 | M | No      | IPMN | high         | 7.0  | main           | intestinal       | body/tail       | Cyst wall  |
| 121 | No mutation detected | R201H                | 77 | M | No      | IPMN | high         | 7.0  | main           | intestinal       | entire pancreas | Cyst wall  |
| 122 | G12V                 | R201H                | 35 | M | No      | IPMN | high         | 8.0  | main           | intestinal       | head            | Cyst wall  |
| 123 | G12V                 | R201H                | 69 | M | No      | IPMN | high         | 5.1  | mixed          | intestinal       | head            | Cyst wall  |
| 124 | G12V                 | No mutation detected | 64 | F | Yes     | IPMN | low          | 2.0  | branch         | gastric          | body/tail       | Cyst wall  |
| 125 | No mutation detected | R201C                | 76 | F | Yes     | IPMN | high         | 1.5  | main           | intestinal       | body/tail       | Cyst wall  |
| 126 | G12D                 | No mutation detected | 69 | F | unknown | IPMN | intermediate | 3.4  | mixed          | gastric          | body/tail       | Cyst wall  |
| 127 | G12D                 | R201H                | 79 | F | unknown | IPMN | high         | 14   | main           | not determined   | entire pancreas | Cyst wall  |
| 128 | G12D                 | No mutation detected | 74 | M | unknown | IPMN | intermediate | 8.0  | main           | gastric          | head            | Cyst wall  |
| 129 | G12D                 | No mutation detected | 56 | M | unknown | IPMN | intermediate | 4    | branch         | gastric          | head            | Cyst wall  |
| 130 | G12D & G12V          | R201C                | 68 | F | Yes     | IPMN | intermediate | 2.5  | branch         | gastric          | body/tail       | Cyst fluid |
| 131 | G12V                 | R201C                | 73 | F | Yes     | IPMN | high         | 6.0  | mixed          | intestinal       | entire pancreas | Cyst fluid |
| 132 | G12V & G12R          | R201H                | 71 | M | No      | IPMN | intermediate | 3.0  | mixed          | gastric          | body/tail       | Cyst wall  |



Table S3. Characteristics of patients with cyst types other than IPMN, including GNAS and KRAS mutation status.

| Cyst # | KRAS                 | GNAS                 | Age at surgery | Sex | History of smoking | Post-operative diagnosis | Cyst Grade | Cyst diameter (cm) | Cyst location | Sample type |
|--------|----------------------|----------------------|----------------|-----|--------------------|--------------------------|------------|--------------------|---------------|-------------|
| OT01   | No mutation detected | No mutation detected | 57             | F   | unknown            | SCA                      | NA         | 2.5                | head          | Cyst fluid  |
| OT02   | No mutation detected | No mutation detected | 58             | F   | No                 | SCA                      | NA         | 1.5                | Neck          | Cyst fluid  |
| OT03   | No mutation detected | No mutation detected | 54             | M   | unknown            | SCA                      | NA         | 2                  | head          | Cyst fluid  |
| OT04   | No mutation detected | No mutation detected | 57             | M   | Yes                | SCA                      | NA         | 2                  | body/tail     | Cyst fluid  |
| OT05   | No mutation detected | No mutation detected | 69             | F   | unknown            | SCA                      | NA         | 3                  | tail          | Cyst fluid  |
| OT06   | No mutation detected | No mutation detected | 57             | F   | Yes                | SCA                      | NA         | 3                  | body/tail     | Cyst fluid  |
| OT07   | No mutation detected | No mutation detected | 59             | F   | No                 | SCA                      | NA         | 3                  | head          | Cyst fluid  |
| OT08   | No mutation detected | No mutation detected | 64             | F   | No                 | SCA                      | NA         | 3                  | head          | Cyst fluid  |
| OT09   | No mutation detected | No mutation detected | 60             | F   | unknown            | SCA                      | NA         | 3.1                | head          | Cyst fluid  |
| OT10   | No mutation detected | No mutation detected | 56             | M   | Yes                | SCA                      | NA         | 4                  | body          | Cyst fluid  |
| OT11   | No mutation detected | No mutation detected | 47             | F   | Yes                | SCA                      | NA         | 4                  | head          | Cyst fluid  |
| OT12   | No mutation detected | No mutation detected | 49             | F   | unknown            | SCA                      | NA         | 4                  | head          | Cyst fluid  |
| OT13   | No mutation detected | No mutation detected | 52             | M   | unknown            | SCA                      | NA         | 4.5                | tail          | Cyst fluid  |
| OT14   | No mutation detected | No mutation detected | 58             | F   | unknown            | SCA                      | NA         | 4.8                | tail          | Cyst fluid  |
| OT15   | No mutation detected | No mutation detected | 46             | M   | Yes                | SCA                      | NA         | 5                  | head          | Cyst fluid  |
| OT16   | No mutation detected | No mutation detected | 81             | M   | unknown            | SCA                      | NA         | 5                  | head          | Cyst fluid  |
| OT17   | No mutation detected | No mutation detected | 77             | F   | unknown            | SCA                      | NA         | 6                  | body          | Cyst fluid  |
| OT18   | No mutation detected | No mutation detected | 61             | F   | unknown            | SCA                      | NA         | 6                  | tail          | Cyst fluid  |
| OT19   | No mutation detected | No mutation detected | 72             | M   | Yes                | SCA                      | NA         | 7                  | body/tail     | Cyst fluid  |
| OT20   | No mutation detected | No mutation detected | 61             | F   | unknown            | SCA                      | NA         | 7.5                | body          | Cyst fluid  |
| OT21   | No mutation detected | No mutation detected | 77             | F   | Yes                | SCA                      | NA         | 8                  | body/tail     | Cyst fluid  |
| OT22   | No mutation detected | No mutation detected | 55             | F   | unknown            | SCA                      | NA         | 10                 | tail          | Cyst fluid  |
| OT23   | No mutation detected | No mutation detected | 61             | F   | unknown            | SCA                      | NA         | 13                 | tail          | Cyst fluid  |
| OT24   | No mutation detected | No mutation detected | 43             | M   | No                 | SCA                      | NA         | 1.5                | head          | Cyst fluid  |
| OT25   | No mutation detected | No mutation detected | 63             | M   | unknown            | SCA                      | NA         | 1.8                | body/tail     | Cyst fluid  |
| OT26   | No mutation detected | No mutation detected | 62             | F   | No                 | SCA                      | NA         | 10.5               | body/tail     | Cyst fluid  |
| OT27   | No mutation detected | No mutation detected | 57             | F   | No                 | SCA                      | NA         | 2.5                | body/tail     | Cyst fluid  |
| OT28   | No mutation detected | No mutation detected | 86             | F   | No                 | SCA                      | NA         | 2.5                | body/tail     | Cyst fluid  |
| OT29   | No mutation detected | No mutation detected | 58             | M   | Yes                | SCA                      | NA         | 2.5                | body/tail     | Cyst fluid  |
| OT30   | No mutation detected | No mutation detected | 68             | F   | unknown            | SCA                      | NA         | 2.5                | head          | Cyst fluid  |
| OT31   | No mutation detected | No mutation detected | 72             | F   | unknown            | SCA                      | NA         | 2.8                | body/tail     | Cyst fluid  |
| OT32   | No mutation detected | No mutation detected | 63             | F   | Yes                | SCA                      | NA         | 3                  | body/tail     | Cyst fluid  |
| OT33   | No mutation detected | No mutation detected | 47             | F   | Yes                | SCA                      | NA         | 3                  | head          | Cyst fluid  |
| OT34   | No mutation detected | No mutation detected | 64             | M   | Yes                | SCA                      | NA         | 3.5                | head          | Cyst fluid  |
| OT35   | No mutation detected | No mutation detected | 52             | F   | No                 | SCA                      | NA         | 3.5                | body/tail     | Cyst fluid  |
| OT36   | No mutation detected | No mutation detected | 71             | F   | No                 | SCA                      | NA         | 3.7                | body/tail     | Cyst fluid  |
| OT37   | No mutation detected | No mutation detected | 77             | F   | Yes                | SCA                      | NA         | 4                  | body/tail     | Cyst fluid  |
| OT38   | No mutation detected | No mutation detected | 36             | F   | unknown            | SCA                      | NA         | 4.1                | head          | Cyst fluid  |

|      |                      |                      |    |   |         |      |                |      |             |            |
|------|----------------------|----------------------|----|---|---------|------|----------------|------|-------------|------------|
| OT39 | No mutation detected | No mutation detected | 74 | F | unknown | SCA  | NA             | 4.5  | head        | Cyst fluid |
| OT40 | No mutation detected | No mutation detected | 66 | M | No      | SCA  | NA             | 5    | body/tail   | Cyst fluid |
| OT41 | No mutation detected | No mutation detected | 40 | F | unknown | SCA  | NA             | 5.4  | body/tail   | Cyst fluid |
| OT42 | No mutation detected | No mutation detected | 56 | F | No      | SCA  | NA             | 5.9  | body/tail   | Cyst fluid |
| OT43 | No mutation detected | No mutation detected | 19 | F | unknown | SCA  | NA             | 6.6  | head        | Cyst fluid |
| OT44 | No mutation detected | No mutation detected | 69 | M | unknown | SCA  | NA             | 7.5  | head        | Cyst fluid |
| OT45 | No mutation detected | No mutation detected | 32 | F | Yes     | MCN  | Not determined | 2.3  | body        | Cyst fluid |
| OT46 | No mutation detected | No mutation detected | 51 | F | Yes     | MCN  | Not determined | 2.5  | body        | Cyst fluid |
| OT47 | G12V                 | No mutation detected | 65 | F | No      | MCN  | Not determined | 2.5  | tail        | Cyst fluid |
| OT48 | G12V                 | No mutation detected | 46 | F | No      | MCN  | low            | 2.5  | tail        | Cyst fluid |
| OT49 | G12V                 | No mutation detected | 43 | F | Yes     | MCN  | Not determined | 3.2  | body        | Cyst fluid |
| OT50 | No mutation detected | No mutation detected | 46 | F | No      | MCN  | Not determined | 3.5  | body        | Cyst fluid |
| OT51 | No mutation detected | No mutation detected | 65 | F | Yes     | MCN  | Not determined | 4    | tail        | Cyst fluid |
| OT52 | No mutation detected | No mutation detected | 60 | F | Yes     | MCN  | low            | 4    | body/tail   | Cyst fluid |
| OT53 | No mutation detected | No mutation detected | 59 | F | No      | MCN  | Not determined | 4.5  | tail        | Cyst fluid |
| OT54 | No mutation detected | No mutation detected | 52 | F | No      | MCN  | Not determined | 5    | body / tail | Cyst fluid |
| OT55 | No mutation detected | No mutation detected | 24 | F | unknown | MCN  | low            | 5    | body/tail   | Cyst fluid |
| OT56 | No mutation detected | No mutation detected | 43 | F | Yes     | MCN  | Not determined | 5.5  | body        | Cyst fluid |
| OT57 | No mutation detected | No mutation detected | 59 | F | Yes     | MCN  | low            | 7    | body/tail   | Cyst fluid |
| OT58 | G12V                 | No mutation detected | 42 | F | No      | MCN  | Not determined | 8.5  | body / tail | Cyst fluid |
| OT59 | No mutation detected | No mutation detected | 34 | F | unknown | MCN  | low            | 16   | head        | Cyst fluid |
| OT60 | G12D                 | No mutation detected | 57 | F | No      | MCN  | low            | 17   | body        | Cyst fluid |
| OT61 | G12R                 | No mutation detected | 66 | F | Yes     | MCN  | low            | 1.5  | head        | Cyst fluid |
| OT62 | G12R                 | No mutation detected | 39 | F | unknown | MCN  | low            | 2.5  | body/tail   | Cyst fluid |
| OT63 | No mutation detected | No mutation detected | 36 | F | unknown | MCN  | low            | 3.5  | head        | Cyst fluid |
| OT64 | No mutation detected | No mutation detected | 54 | F | unknown | MCN  | low            | 5.5  | body/tail   | Cyst fluid |
| OT65 | No mutation detected | No mutation detected | 42 | F | unknown | MCN  | intermediate   | 7.4  | head        | Cyst fluid |
| OT66 | G12D                 | No mutation detected | 45 | F | unknown | IOPN | high           | 3.1  | head        | Cyst fluid |
| OT67 | No mutation detected | No mutation detected | 36 | M | unknown | IOPN | high           | 4.5  | head        | Cyst fluid |
| OT68 | No mutation detected | No mutation detected | 72 | M | No      | IOPN | high           | 6.0  | head        | Cyst fluid |
| OT69 | No mutation detected | No mutation detected | 74 | M | Yes     | IOPN | high           | 6.0  | body/tail   | Cyst fluid |
| OT70 | No mutation detected | No mutation detected | 55 | F | unknown | IOPN | high           | 10.0 | tail        | Cyst fluid |

Table S4. Quantification of mutations in selected IPMNs containing both *GNAS* and *KRAS* mutations.

| IPMN # | <i>KRAS</i> mutant allele(s) | Major <i>KRAS</i> mutant allele | Major <i>KRAS</i> allele freq | Major <i>KRAS</i> allele fraction/total mutant alleles* |
|--------|------------------------------|---------------------------------|-------------------------------|---------------------------------------------------------|
| 31     | G12D & G12V & G12R           | G12D                            | 29%                           | 97%                                                     |
| 36     | G12D                         | G12D                            | 18%                           | Not applicable                                          |
| 41     | G12D                         | G12D                            | 3.0%                          | NA                                                      |
| 42     | G12D                         | G12D                            | 17%                           | NA                                                      |
| 43     | G12D                         | G12D                            | 33%                           | NA                                                      |
| 48     | G12R                         | G12S                            | 1.6%                          | NA                                                      |
| 57     | G12R                         | G12S                            | 0.8%                          | NA                                                      |
| 65     | G12D & G12R                  | G12D                            | 27%                           | 88%                                                     |
| 67     | G12V                         | G12V                            | 8.0%                          | NA                                                      |
| 72     | G12D                         | G12D                            | 36%                           | NA                                                      |
| 78     | G12D & G12V                  | G12V                            | 0.9%                          | 65%                                                     |
| 79     | G12V & G12R                  | G12V                            | 11%                           | 60%                                                     |
| 86     | G12D & G12V                  | G12V                            | 18%                           | 50%                                                     |
| 87     | G12D & G12V & G12R           | G12V                            | 8%                            | 46%                                                     |
| 100    | G12R                         | G12S                            | 1.4%                          | NA                                                      |
| 105    | G12V                         | G12V                            | 1.0%                          | NA                                                      |
| 130    | G12D & G12V                  | G12V                            | 4.0%                          | 56%                                                     |

\* NA = Not applicable because there was only a single mutation identified in the IPMN.

Table S5. Comparison of mutational status in DNA from IPMNs and pancreatic adenocarcinomas from the same patients.

| <b>IPMN #</b> | <b>Lesion</b> | <b>KRAS mutation</b> | <b>GNAS mutation</b> |
|---------------|---------------|----------------------|----------------------|
| 9             | IPMN          | G12V & G12D          | R201H & R201C        |
|               | Cancer        | G12V                 | R201H                |
| 11            | IPMN          | No mutation detected | R201C                |
|               | Cancer        | No mutation detected | R201C                |
| 20            | IPMN          | G12V                 | R201C                |
|               | Cancer        | G12V                 | R201C                |
| 33            | IPMN          | G12V                 | R201H                |
|               | Cancer        | G12R                 | No mutation detected |
| 122           | IPMN          | G12V                 | R201H                |
|               | Cancer        | G12V                 | R201H                |
| 125           | IPMN          | No mutation detected | R201C                |
|               | Cancer        | No mutation detected | R201C                |
| 127           | IPMN          | G12D                 | R201H                |
|               | Cancer        | G12D                 | R201H                |
| 131           | IPMN          | G12V                 | R201C                |
|               | Cancer        | G12V                 | R201C                |

Table S6. Oligonucleotide primer and probe sequences.

| Gene                             | Used for:                                                | 5'-Modification | Mutation                     | Sequence (5'-3')*                                     |
|----------------------------------|----------------------------------------------------------|-----------------|------------------------------|-------------------------------------------------------|
| <b>PCR Amplification Primers</b> |                                                          |                 |                              |                                                       |
| <i>GNAS</i>                      | GNAS Forward Primer                                      | None            | <b>GNAS 201 R201C, R201H</b> | GGCTTTGGTGAGATCCATTG                                  |
| <i>GNAS</i>                      | GNAS Reverse Primer                                      | None            | <b>GNAS 201 R201C, R201H</b> | TCCACCTGGAACCTGGTCTC                                  |
| <i>KRAS</i>                      | PCR forward primer                                       | None            | <b>KRAS G12D, G12R, G12V</b> | GATCATATTCGTCCACAAAATGATTC                            |
| <i>KRAS</i>                      | PCR Reverse Primer                                       | None            | <b>KRAS G12D, G12R, G12V</b> | TGACTGAATATAAACTTGTGGTAGTTG                           |
| <b>Ligation probes</b>           |                                                          |                 |                              |                                                       |
| <i>GNAS</i>                      | WT-specific probe                                        | 6-FAM           | R201H                        | ATG GAG AAC TTG ACG TCC TG TTC GCT GCC G              |
| <i>GNAS</i>                      | Mutant-specific probe                                    | HEX             | R201H                        | TTCGCTGCCA                                            |
| <i>GNAS</i>                      | Common anchoring probe                                   | Phosphate       | R201H                        | TGT CCT GAC TTC <b>GG TGT CCA CTA GTC ATG CTT</b>     |
| <i>GNAS</i>                      | WT-specific probe                                        | 6-FAM           | R201C                        | ATG GAG AAC TTG ACG TCC AC CTT CGC TGC C              |
| <i>GNAS</i>                      | Mutant-specific probe                                    | HEX             | R201C                        | CTT *CGC T*G*C T                                      |
| <i>GNAS</i>                      | Common anchoring probe                                   | Phosphate       | R201C                        | GTG TCC TGA CTT <b>GG TGT CCA CTA GTC ATG CTT</b>     |
| <i>KRAS</i>                      | WT-specific probe                                        | 6-FAM           | G12D                         | ATG GAG AAC TTG ACG TCC T C CTA CGC CAC               |
| <i>KRAS</i>                      | Mutant-specific probe                                    | HEX             | G12D                         | TGCCT*ACGC*C*AT                                       |
| <i>KRAS</i>                      | Common anchoring probe                                   | Phosphate       | G12D                         | CAG CTC CAA CTA <b>GG TGT CCA CTA GTC ATG CTT</b>     |
| <i>KRAS</i>                      | WT-specific probe                                        | 6-FAM           | G12R                         | TCC CGC GAA ATT AAT ACG AG <b>CTA CGC CACC</b>        |
| <i>KRAS</i>                      | Mutant-specific probe                                    | HEX             | G12R                         | CTA CGC CAC G                                         |
| <i>KRAS</i>                      | Common anchoring probe                                   | Phosphate       | G12R                         | AGC TCC AAC TAC CAC <b>GG TGT CCA CTA GTC ATG CTT</b> |
| <i>KRAS</i>                      | WT-specific probe                                        | 6-FAM           | G12V                         | ATG GAG AAC TTG ACG TCC T C CTA CGC CAC               |
| <i>KRAS</i>                      | Mutant-specific probe                                    | HEX             | G12V                         | CCT ACG CCA A                                         |
| <i>KRAS</i>                      | Common anchoring probe                                   | Phosphate       | G12V                         | CAG CTC CAA CTA <b>GG TGT CCA CTA GTC ATG CTT</b>     |
| <b>BEAMing probes</b>            |                                                          |                 |                              |                                                       |
| <i>GNAS</i>                      | Detecting beads containing either WT or mutant sequences | ROX             | R201C                        | CTGAAACAAAATTGAGGT                                    |
| <i>GNAS</i>                      | WT-specific probe                                        | Cy3             | R201C                        | AGGACACgGCAGCGA                                       |
| <i>GNAS</i>                      | Mutant-specific probe                                    | Cy5             | R201C                        | AGGACACaGCAGCGA                                       |
| <i>GNAS</i>                      | Detecting beads containing either WT or mutant sequences | ROX             | R201H                        | CTGAAACAAAATTGAGGT                                    |
| <i>GNAS</i>                      | WT-specific probe                                        | Cy3             | R201H                        | CAGGACACGGCAGCG                                       |
| <i>GNAS</i>                      | Mutant-specific probe                                    | Cy5             | R201H                        | CAGGACATGGCAGCG                                       |
| <i>KRAS</i>                      | Detecting beads containing either WT or mutant sequences | ROX             | G12D                         | TGACGATACAGCTAATTCA                                   |
| <i>KRAS</i>                      | WT-specific probe                                        | Cy3             | G12D                         | GGAGCTGGTGGCGTA                                       |
| <i>KRAS</i>                      | Mutant-specific probe                                    | Cy5             | G12D                         | GGAGCTGATGGCGTA                                       |
| <i>KRAS</i>                      | Detecting beads containing either WT or mutant sequences | ROX             | G12V                         | TGACGATACAGCTAATTCA                                   |
| <i>KRAS</i>                      | WT-specific probe                                        | Cy3             | G12V                         | GGAGCTGGTGGCGTA                                       |
| <i>KRAS</i>                      | Mutant-specific probe                                    | Cy5             | G12V                         | GGAGCTGTTGGCGTA                                       |
| <i>KRAS</i>                      | Detecting beads containing either WT or mutant sequences | ROX             | G12R                         | TGACGATACAGCTAATTCA                                   |
| <i>KRAS</i>                      | WT-specific probe                                        | Cy3             | G12R                         | TGGAGCTGGTGGCGT                                       |
| <i>KRAS</i>                      | Mutant-specific probe                                    | Cy5             | G12R                         | TGGAGCTCGTGGCGT                                       |

\* indicates LNA linkages; red font indicates additional nucleotides used to discriminate WT from Mutant sequences in the ligation assays.
